# Supplementary material for: A nine-fold enhancement of visible-light photocatalytic hydrogen production of g-C3N4 with TCNQ by forming a conjugated structure
Source: Royal Society of Chemistry journal article supplement (doi:10.1039/c9ra10819j), 2020-01-01
Supplement: c9ra10819j1.pdf [file c9ra10819j1.pdf]

## Electronic Supplementary Information

# A nine-fold enhancement of visible-light photocatalytic hydrogen production of g-C<sub>3</sub>N<sub>4</sub> with TCNQ by forming conjugated structure

*Fengzhi Wang, Weisheng Lei, Xinhua Pan\*, Bin Lu, Zhizhen Ye*

State Key Laboratory of Silicon Materials, School of Materials Science and Engineering,  
Zhejiang University, Hangzhou 310027, People's Republic of China

\* Corresponding authors. Tel.: + 86 571 87952187; fax: + 86 571 87952124. E-mail addresses: panxinhua@zju.edu.cn.

## Characterization of g-C<sub>3</sub>N<sub>4</sub> and TCNQ-C<sub>3</sub>N<sub>4</sub> photocatalysts

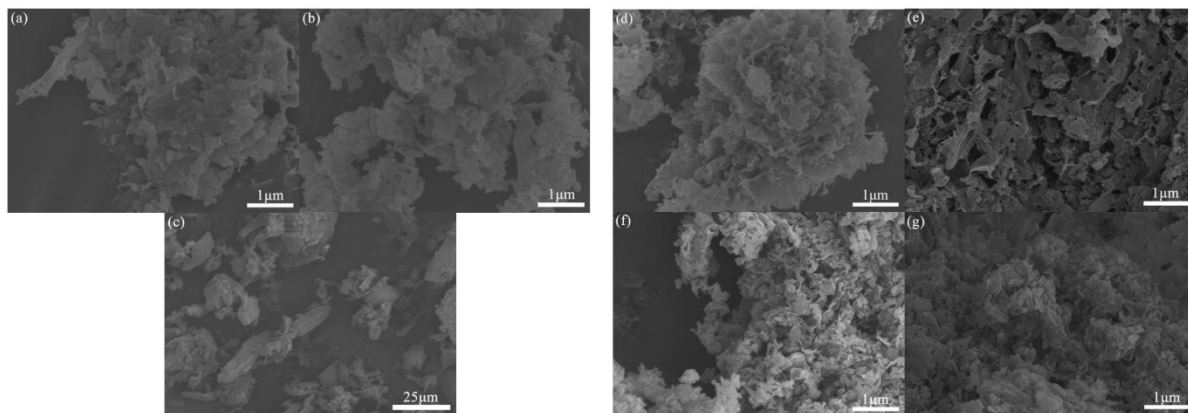

**Fig. S1** (a) SEM images of: (a) g-C<sub>3</sub>N<sub>4</sub> (bulk); (b) g-C<sub>3</sub>N<sub>4</sub> (APTES); (c) TCNQ; (d) 2%TCNQ-C<sub>3</sub>N<sub>4</sub>; (e) 5%TCNQ-C<sub>3</sub>N<sub>4</sub>; (f) 10%TCNQ-C<sub>3</sub>N<sub>4</sub>; (g) 15%TCNQ-C<sub>3</sub>N<sub>4</sub>.

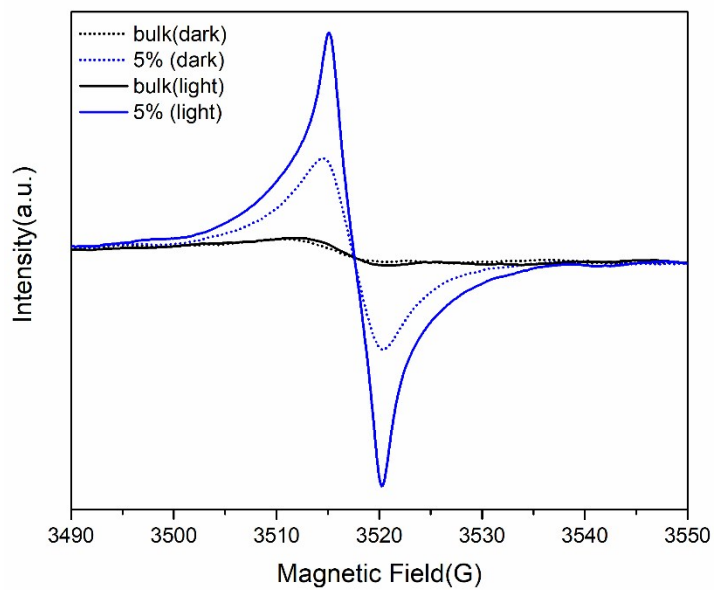

**Fig. S2** EPR spectra of bulk g-C<sub>3</sub>N<sub>4</sub> and 5%TCNQ-C<sub>3</sub>N<sub>4</sub>.

### Calculated apparent quantum yield (AQY) at different wavelength

$$\text{AQY} \quad (\%) = \frac{2 \times \text{number of evolved } H_2 \text{ molecules}}{\text{number of incident photons}} \times 100\% = \frac{2 \times M \times N_A}{S \times P \times t \times \frac{\lambda}{\hbar \times c}} \times 100\%$$

In the formula,  $M$  is the amount of  $H_2$  molecules per hour ( $\mu\text{mol h}^{-1}$ );  $N_A$  is the Avogadro constant ( $6.02 \times 10^{23} \text{ mol}^{-1}$ );  $S$  is the irradiation area ( $1.5 \times 1.5 \times \pi \text{ cm}^2$ );  $P$  is the intensity of monochromatic light ( $\text{W cm}^{-2}$ ), detected by optical power meter;  $t$  is the light irradiation time (1h);  $\lambda$  is the wavelength of the monochromatic light (nm);  $\hbar$  is the Plank constant ( $6.626 \times 10^{-34} \text{ J s}$ );  $c$  is the speed of light ( $3 \times 10^8 \text{ m s}^{-1}$ ).

Table S1. Calculated AQY at different wavelengths

| Wavelength<br>(nm) | Light intensity<br>( $10^{-3} \text{ W cm}^{-2}$ ) | Amount of $H_2$<br>( $\mu\text{mol h}^{-1}$ ) | AQY<br>(%) |
|--------------------|----------------------------------------------------|-----------------------------------------------|------------|
| 365                | 32.00                                              | 4.2053                                        | 0.34       |
| 420                | 20.00                                              | 4.4398                                        | 0.50       |
| 450                | 15.51                                              | 3.5703                                        | 0.48       |
| 485                | 15.40                                              | 2.3199                                        | 0.30       |
| 535                | 2.76                                               | 0.7838                                        | 0.50       |
| 595                | 0.79                                               | 0.8947                                        | 1.79       |
| 630                | 5.62                                               | 0.5840                                        | 0.16       |

$\lambda=365$

nm:

$$AQY (\%) = \frac{2 \times 4.2053 \times 10^{-6} \times 6.022 \times 10^{23}}{\pi \times 1.5^2 \times 32.00 \times 10^{-3} \times 3600 \times \frac{365 \times 10^{-9}}{6.626 \times 10^{-34} \times 3 \times 10^8}} = 0.34\%$$

$\lambda=420$  nm:

$$AQY (\%) = \frac{2 \times 4.4398 \times 10^{-6} \times 6.022 \times 10^{23}}{\pi \times 1.5^2 \times 20.00 \times 10^{-3} \times 3600 \times \frac{420 \times 10^{-9}}{6.626 \times 10^{-34} \times 3 \times 10^8}} = 0.50\%$$

$\lambda=450$  nm:

$$AQY (\%) = \frac{2 \times 3.5703 \times 10^{-6} \times 6.022 \times 10^{23}}{\pi \times 1.5^2 \times 15.51 \times 10^{-3} \times 3600 \times \frac{450 \times 10^{-9}}{6.626 \times 10^{-34} \times 3 \times 10^8}} = 0.48\%$$

$\lambda=485$  nm:

$$AQY (\%) = \frac{2 \times 2.3199 \times 10^{-6} \times 6.022 \times 10^{23}}{\pi \times 1.5^2 \times 15.40 \times 10^{-3} \times 3600 \times \frac{485 \times 10^{-9}}{6.626 \times 10^{-34} \times 3 \times 10^8}} = 0.30\%$$

$\lambda=535$  nm:

$$AQY (\%) = \frac{2 \times 0.7838 \times 10^{-6} \times 6.022 \times 10^{23}}{\pi \times 1.5^2 \times 2.76 \times 10^{-3} \times 3600 \times \frac{535 \times 10^{-9}}{6.626 \times 10^{-34} \times 3 \times 10^8}} = 0.50\%$$

$\lambda=595$  nm:

$$AQY (\%) = \frac{2 \times 0.8947 \times 10^{-6} \times 6.022 \times 10^{23}}{\pi \times 1.5^2 \times 0.79 \times 10^{-3} \times 3600 \times \frac{595 \times 10^{-9}}{6.626 \times 10^{-34} \times 3 \times 10^8}} = 1.79\%$$

$\lambda=630$  nm:

$$AQY (\%) = \frac{2 \times 0.5840 \times 10^{-6} \times 6.022 \times 10^{23}}{\pi \times 1.5^2 \times 5.62 \times 10^{-3} \times 3600 \times \frac{630 \times 10^{-9}}{6.626 \times 10^{-34} \times 3 \times 10^8}} = 0.16\%$$
